# Supplementary material for: Strike at the root: exploring the transferability of heat stress tolerance in tomatoes by reciprocal grafting
Source: Front Plant Sci. 2025 Jul 24;16:1549737. doi: 10.3389/fpls.2025.1549737 (PMC12328372; doi:10.3389/fpls.2025.1549737)
Supplement: Supplementary file 9 [file Table7.xlsx]

## Sheet: Screening_raw_data
SampleID	Genotype	Cabin	Treatment	DoT	Croptime	FW_shoot	DW_shoot	DW_total	DWC_shoot	DW_root	Trusses	Flowers_total_number	Flowers_discarded	FAR	Leaves_number	Stem_length
C2T01	T01	C2	heat	19	359.803	252.367	23.7042	30.6076	0.0939277	6.90333
C2T02	T02	C2	heat	20	378.622	251.75	24.9019	33.4219	0.0989152	8.52	2	14	0	0	10.5	47
C2T03	T03	C2	heat	21	393.46	292.9	30.5197	38.7931	0.104198	8.27333	4	29.6667	0	0	19.6667	115
C2T04	T04	C2	heat	21	393.46	259.3	28.0738	36.6838	0.108268	8.61	3.33333	16.6667	0.333333	0.025641	17.6667	103.333
C2T05	T05	C2	heat	21	393.46	304.467	32.2784	41.4117	0.106016	9.13333	5	45	12	0.266925	20.6667	113.333
C2T06	T06	C2	heat	21	393.46	249.3	26.3096	36.0896	0.105534	9.78	3.66667	22.6667	0	0	13.6667	73.3333
C2T07	T07	C2	heat	21	393.46	367.667	33.0802	44.6302	0.0899734	11.55	3.66667	16	1.66667	0.0969499	19.6667	87.6667
C2T08	T08	C2	heat	19	359.803	236.6	19.6026	26.6592	0.0828511	7.05667	2.66667	7.66667	0	0	18	92
C2T09	T09	C2	heat	20	378.622	278.733	27.5461	35.7627	0.0988258	8.21667	4.66667	29.3333	2.66667	0.0868687	21	86.3333
C2T10	T10	C2	heat	20	378.622	238	23.843	31.463	0.100181	7.62	4	18	4.33333	0.263131	18.6667	88.3333
C2T11	T11	C2	heat	20	378.622	335.033	29.7263	38.923	0.0887263	9.19667	3	9	0	0	18.6667	72.3333
C2T12	T12	C2	heat	21	393.46	414.233	42.0686	51.8786	0.101558	9.81	4	19.6667	0	0	16.3333	80.3333
C2T13	T13	C2	heat	19	359.803	315.833	27.4982	35.6416	0.0870656	8.14333	3	12	0	0	15	81.3333
C2T14	T14	C2	heat	19	359.803	278.333	25.2563	34.5897	0.0907413	9.33333	3.66667	22.3333	0	0	13	57.6667
C2T15	T15	C2	heat	21	393.46	277.233	27.7973	36.414	0.100267	8.61667	4.66667	36.6667	0.333333	0.0119048	22	103.667
C2T16	T16	C2	heat	20	378.622	323.467	31.6104	43.3704	0.0977239	11.76	6	34.3333	2.33333	0.0752688	16.3333	71
C2T17	T17	C2	heat	20	378.622	268.867	27.9825	35.1725	0.104076	7.19	4	29.6667	0	0	20.6667	92.3333
C2T18	T18	C2	heat	20	378.622	305.567	29.3927	35.7194	0.0961909	6.32667	4	31.6667	2	0.0639258	20	91
C2T19	T19	C2	heat	20	378.622	250.533	23.5785	30.1552	0.0941132	6.57667	4.33333	34.6667	2.66667	0.0763889	19.3333	97
C2T20	T20	C2	heat	19	359.803	205.5	21.3999	27.4699	0.104136	6.07	4.33333	27.6667	1.33333	0.0437276	19.3333	98.3333
C2T21	T21	C2	heat	20	378.622	314.967	29.4518	38.1585	0.0935077	8.70667	4	25	4.33333	0.181658	19.3333	85.3333
C2T22	T22	C2	heat	21	393.46	235.9	22.7898	30.0532	0.096608	7.26333	3.66667	23.3333	5.33333	0.231481	18.3333	77.3333
C2T23	T23	C2	heat	19	359.803	165.833	17.2966	22.1566	0.104301	4.86	3.66667	27	1.33333	0.04806	18.3333	113
C2T24	T24	C2	heat	19	359.803	403.5	38.7478	50.2111	0.0960291	11.4633	5.33333	37.3333	1.33333	0.0333993	22.3333	106.667
C2T25	T25	C2	heat	20	378.622	298.7	26.1871	32.1338	0.0876703	5.94667	3.66667	33	10	0.354545	18.3333	76.6667
C2T26	T26	C2	heat	19	359.803	343.7	31.3078	40.9745	0.0910906	9.66667	5	42.6667	7.66667	0.175289	23	98.3333
C2T27	T27	C2	heat	19	359.803	337.3	27.3902	35.7736	0.0812043	8.38333	3.33333	11.6667	0	0	17	76
C2T28	T28	C2	heat	21	393.46	306.867	28.1895	36.7662	0.0918625	8.57667	3	25.3333	0.666667	0.0289855	20.3333	96
C2T29	T29	C2	heat	20	378.622	252.6	23.8756	30.9056	0.0945195	7.03	4.5	36	6.5	0.156776	19.5	92.5
C2T30	T30	C2	heat	21	393.46	352.767	34.0662	44.3129	0.0965688	10.2467	4	24.3333	2	0.0884211	20.6667	93
C2T31	T31	C2	heat	19	359.803	164.167	14.4018	19.6651	0.0877266	5.26333	2.5	19	0.5	0.02	17.5	85.5
C2T32	T32	C2	heat	20	378.622	299.667	30.332	36.6153	0.101219	6.28333	3.66667	24.6667	1.66667	0.0574713	20	87.3333
C2T33	T33	C2	heat	20	378.622	412	43.7921	55.6254	0.106291	11.8333	5	24.6667	0.333333	0.0151515	19.3333	97
C2T34	T34	C2	heat	21	393.46	333.167	29.5469	38.9602	0.088685	9.41333	2.66667	18	0	0	17	71.3333
C2T35	T35	C2	heat	20	378.622	340	37.1634	46.8534	0.109304	9.69	3.33333	14.6667	0	0	14.6667	64
C2T36	T36	C2	heat	21	393.46	321.4	29.3483	39.0233	0.091314	9.675	3	19.5	0.5	0.0294118	19	68.5
C2T37	T37	C2	heat	19	359.803	265.6	24.4462	31.4762	0.0920415	7.03	3	18.3333	0	0	10	60
C2T38	T38	C2	heat	20	378.622	238.867	23.839	30.6257	0.0998006	6.78667	3.33333	18.3333	0	0	11.3333	57
C2T39	T39	C2	heat	21	393.46	355.667	32.4962	42.7962	0.0913671	10.3	4.66667	37.3333	6.66667	0.177083	18.3333	99
C2T40	T40	C2	heat	21	393.46	109.6	9.94	15.2	0.0906934	5.26	5	29	0	0	18	76
C2T41	T41	C2	heat	20	378.622	288.25	29.4714	36.5714	0.102243	7.1	4	26.5	1	0.0322581	20.5	100.5
C2T42	T42	C2	heat	20	378.622	247.833	24.267	27.487	0.0979167	3.22	4	27.3333	2	0.0871212	21	77.3333
C2T43	T43	C2	heat	20	378.622	190.567	19.1588	25.1522	0.100536	5.99333	5.33333	83.6667	12.6667	0.188495	20.6667	72
C2T44	T44	C2	heat	20	378.622	283.067	30.4714	40.9381	0.107648	10.4667	5	38.3333	10.6667	0.277727	23.6667	97.6667
C2T45	T45	C2	heat	19	359.803	281.933	22.5	33.3567	0.0798063	10.8567	5.66667	38.3333	1.66667	0.0387597	23	97.3333
C2T46	T46	C2	heat	19	359.803	337.133	31.1808	41.4875	0.0924881	10.3067	6	43.3333	0	0	22.3333	103.333
C2T47	T47	C2	heat	21	393.46	264.933	30.7167	39.1567	0.115941	8.44	3	22.3333	0	0	22	107.667
C2T48	T48	C2	heat	19	359.803	196.933	16.9809	23.7409	0.0862264	6.76	5	27.3333	0.333333	0.010101	23.6667	91
C2T49	T49	C2	heat	21	393.46	405.9	37.3322	42.7289	0.0919739	5.39667	5.66667	36	3.33333	0.0757576	24	101
C2T50	T50	C2	heat	21	393.46	194.267	18.5906	25.6372	0.0956962	7.04667	5.33333	27.3333	1	0.03125	19.3333	94
C2T51	T51	C2	heat	19	359.803	228.433	21.9867	30.63	0.09625	8.64333	5.66667	24.3333	0.333333	0.0119048	23.3333	79.3333
C2T52	T52	C2	heat	19	359.803	214.667	19.6481	26.3748	0.0915285	6.72667	5.66667	35	0.666667	0.0256757	21.3333	81.6667
C2T53	T53	C2	heat	19	359.803	199.9	20.429	26.7224	0.102196	6.29333	6	23.3333	0	0	23.3333	104
C2T54	T54	C2	heat	20	378.622	282.233	25.6592	34.7326	0.0909149	9.07333	4	17.6667	5	0.278431	17	84
C2T55	T55	C2	heat	21	393.46	238.3	26.4861	33.2794	0.111146	6.79333	5	35	0	0	19	76.3333
C2T56	T56	C2	heat	19	359.803	349.9	29.8911	36.9864	0.0854276	7.09533	4.66667	61.3333	0.333333	0.00628931	23.3333	102
C3T01	T01	C3	heat	19	370.392	193.433	19.6927	26.2327	0.101806	6.54	4	29	0	0	16.3333	73.6667
C3T02	T02	C3	heat	20	390.819	313.2	34.29	46.51	0.109483	12.22	3	18	1	0.0555556	12	76
C3T03	T03	C3	heat	20	390.819	293.867	30.4562	39.5462	0.10364	9.09	3.66667	23.6667	3.33333	0.160658	20.6667	105
C3T04	T04	C3	heat	20	390.819	273.833	30.3247	41.7314	0.110742	11.4067	3.66667	21	1	0.0344828	18.6667	97.6667
C3T05	T05	C3	heat	20	390.819	270.4	29.2893	38.9693	0.108319	9.68	4.33333	50.6667	16.3333	0.330574	21.3333	111
C3T06	T06	C3	heat	21	410.269	294.467	31.868	45.228	0.108223	13.36	3.33333	22.3333	0.333333	0.0151515	13.3333	75
C3T07	T07	C3	heat	20	390.819	310.6	30.1409	41.8009	0.0970408	11.66	4	16.3333	1	0.0608466	20	98.6667
C3T08	T08	C3	heat	19	370.392	278.167	23.6456	30.9956	0.0850052	7.35	3	12	0	0	18.3333	100.333
C3T09	T09	C3	heat	20	390.819	257.533	25.5697	35.9797	0.0992871	10.41	4	24	2.66667	0.126984	19.6667	80.6667
C3T10	T10	C3	heat	20	390.819	209.267	22.4326	31.2826	0.107196	8.85	3	18	3.66667	0.21016	19.3333	90
C3T11	T11	C3	heat	21	410.269	383.767	39.2572	52.2472	0.102295	12.99	3	14.3333	0	0	19.6667	84.6667
C3T12	T12	C3	heat	20	390.819	330	32.3598	43.2765	0.09806	10.9167	2.33333	10.3333	1	0.2	16.3333	82.3333
C3T13	T13	C3	heat	19	370.392	259.233	24.3112	33.9545	0.093781	9.64333	3	14.6667	0	0	15.6667	75.3333
C3T14	T14	C3	heat	19	370.392	238.967	22.4067	31.7567	0.0937649	9.35	4	17.3333	0	0	13.6667	55.3333
C3T15	T15	C3	heat	21	410.269	256.467	28.2639	38.3139	0.110205	10.05	4	32	2.66667	0.120915	24.3333	96.3333
C3T16	T16	C3	heat	21	410.269	303.233	31.153	43.1364	0.102736	11.9833	4.66667	47.3333	0.666667	0.0131528	15.3333	76
C3T17	T17	C3	heat	20	390.819	257.4	28.5676	37.1243	0.110985	8.55667	4	30.6667	0.333333	0.0104167	19.6667	103.667
C3T18	T18	C3	heat	20	390.819	243.333	26.0095	34.5361	0.106888	8.52667	4	29.6667	0.333333	0.0111111	20.3333	113.667
C3T19	T19	C3	heat	20	390.819	279.767	27.8385	37.9919	0.0995063	10.1533	4.66667	36.6667	1.66667	0.0407361	19.6667	82.3333
C3T20	T20	C3	heat	19	370.392	165.167	19.3967	26.3467	0.117437	6.95	4.33333	27.6667	0	0	17.3333	96.6667
C3T21	T21	C3	heat	21	410.269	278.3	26.2817	35.4784	0.0944366	9.19667	2.5	13.5	3.5	0.159091	20.5	87
C3T22	T22	C3	heat	20	390.819	225.567	22.938	31.7547	0.101691	8.81667	3.33333	20	7.66667	0.388258	19.6667	76.3333
C3T23	T23	C3	heat	19	370.392	161.433	18.4309	23.2942	0.11417	4.86333	4	30.6667	0	0	17.3333	108.333
C3T24	T24	C3	heat	19	370.392	343.233	34.9776	44.131	0.101906	9.15333	5.66667	34.3333	1.33333	0.046398	22.3333	116.667
C3T25	T25	C3	heat	20	390.819	314.2	31.0677	43.061	0.0988787	11.9933	4.33333	36.6667	9.33333	0.237291	20.6667	89.3333
C3T26	T26	C3	heat	19	370.392	288.9	25.4379	34.1713	0.088051	8.73333	6	46	11	0.224704	20	102
C3T27	T27	C3	heat	19	370.392	324.6	29.6946	39.5513	0.0914806	9.85667	3	15.3333	0.333333	0.0208333	17	72
C3T28	T28	C3	heat	20	390.819	270.567	25.6591	36.4757	0.0948345	10.8167	3	28.3333	0.333333	0.0114943	18	87.6667
C3T29	T29	C3	heat	20	390.819	270.733	28.7938	37.7805	0.106355	8.98667	3.33333	22	0.666667	0.0246914	17.6667	98.3333
C3T30	T30	C3	heat	21	410.269	306.867	33.964	47.194	0.11068	13.23	3.66667	20.6667	0.333333	0.0119048	23	92.6667
C3T31	T31	C3	heat	19	370.392	158.933	15.3201	22.1401	0.0963934	6.82	3.5	19	0	0	16	88.5
C3T32	T32	C3	heat	20	390.819	351.067	34.8713	45.4547	0.0993297	10.5833	2.66667	17.6667	0.666667	0.0277778	19	79
C3T33	T33	C3	heat	20	390.819	328.567	33.5366	44.9133	0.102069	11.3767	3	24.6667	3	0.151515	19.3333	105.667
C3T34	T34	C3	heat	21	410.269	297	28.469	38.7856	0.0958551	10.3167	2.66667	15.3333	0	0	17.3333	74.3333
C3T35	T35	C3	heat	20	390.819	211.2	23.4929	32.2196	0.111235	8.72667	2.33333	16	9	0.575272	14	53
C3T36	T36	C3	heat	21	410.269	308.8	29.1609	40.7209	0.0944329	11.56	3	13.5	0	0	17	79
C3T37	T37	C3	heat	19	370.392	324.033	33.2836	43.7236	0.102716	10.44	3.66667	25.3333	0.333333	0.0133333	12.6667	62
C3T38	T38	C3	heat	20	390.819	325.55	35.246	46.556	0.108266	11.31	3.5	14	7	0.510417	12	61
C3T39	T39	C3	heat	21	410.269	364.2	36.5133	49.6266	0.100256	13.1133	4.66667	47.3333	17	0.364856	21.6667	103
C3T40	T40	C3	heat	20	390.819	243.1	24.39	33.43	0.100329	9.04	5	33	1	0.030303	20	112
C3T41	T41	C3	heat	21	410.269	319.2	34.43	47.76	0.107863	13.33	5	33	0	0	24	110
C3T42	T42	C3	heat	20	390.819	276.367	27.6919	37.1319	0.1002	9.44	4.33333	38.3333	1.66667	0.043018	21.6667	82.6667
C3T43	T43	C3	heat	20	390.819	248	23.1766	31.9333	0.093454	8.75667	4.66667	81	6	0.0793113	21.6667	80.6667
C3T44	T44	C3	heat	21	410.269	286.133	29.9659	43.5626	0.104727	13.5967	4.33333	31	12.6667	0.408399	22.3333	105.667
C3T45	T45	C3	heat	19	370.392	254.867	22.0915	31.1681	0.0866786	9.07667	5.33333	25	0.333333	0.0114943	21.3333	94.3333
C3T46	T46	C3	heat	19	370.392	282	27.1068	37.2402	0.0961235	10.1333	5.66667	36.3333	0	0	21.6667	106
C3T47	T47	C3	heat	20	390.819	230.333	26.474	36.0173	0.114938	9.54333	3	17.6667	0	0	21	110.667
C3T48	T48	C3	heat	19	370.392	185.033	18.219	26.0223	0.0984633	7.80333	4.66667	33	0	0	22	91
C3T49	T49	C3	heat	21	410.269	385.6	39.381	50.6644	0.102129	11.2833	5.66667	36.6667	2	0.0559524	24	99.6667
C3T50	T50	C3	heat	21	410.269	194.767	21.4979	31.3713	0.110378	9.87333	5.33333	31	1	0.0318681	20.3333	93
C3T51	T51	C3	heat	19	370.392	194.767	20.1212	28.4145	0.103309	8.29333	6	28.6667	0.333333	0.0114943	21.6667	81.6667
C3T52	T52	C3	heat	19	370.392	194.8	19.5593	28.716	0.100407	9.15667	5.66667	33	0	0	20.6667	75.3333
C3T53	T53	C3	heat	19	370.392	174.233	18.729	31.4057	0.107494	12.6767	6	35.3333	1.66667	0.0468029	20.6667	97.3333
C3T54	T54	C3	heat	20	390.819	312.1	31.6215	43.1515	0.101318	11.53	4	26	8.66667	0.329215	18	94.3333
C3T55	T55	C3	heat	21	410.269	234.067	29.1503	37.4703	0.124538	8.32	5	36.6667	0	0	18.3333	80.6667
C3T56	T56	C3	heat	19	370.392	350.233	34.2777	43.4044	0.097871	9.12667	5.33333	55.3333	0	0	20	87.6667
C4T01	T01	C4	ctrl	20	215.143	360.7	33.2233	40.5367	0.0921079	7.31333	4	28.3333	0	0	16.3333	55.6667
C4T02	T02	C4	ctrl	22	236.814	378	38.04	46.9	0.100635	8.86	3	24	0	0	10	47
C4T03	T03	C4	ctrl	21	224.56	401.1	36.7237	53.3437	0.0915575	16.62	4	18	0.333333	0.0185185	20.6667	90.6667
C4T04	T04	C4	ctrl	21	224.56	400	37.5132	48.5265	0.0937829	11.0133	3.33333	13.6667	0	0	17.3333	91
C4T05	T05	C4	ctrl	22	236.814	470.267	40.1068	50.1568	0.0852852	10.05	4	34.6667	2.66667	0.0758285	19	117.333
C4T06	T06	C4	ctrl	22	236.814	471.3	43.708	56.5413	0.0927391	12.8333	3	17.6667	0	0	11.6667	59.3333
C4T07	T07	C4	ctrl	21	224.56	520.633	38.5487	51.7887	0.074042	13.24	3.66667	14	0	0	17.3333	77.3333
C4T08	T08	C4	ctrl	20	215.143	375.567	31.7515	39.7015	0.0845428	7.95	3.33333	16.6667	0	0	17.3333	61
C4T09	T09	C4	ctrl	22	236.814	504.967	40.4365	52.5665	0.0800776	12.13	3.33333	20.6667	0	0	18	68
C4T10	T10	C4	ctrl	21	224.56	341.7	31.34	39.3667	0.0917179	8.02667	3	22.6667	0	0	18	73.6667
C4T11	T11	C4	ctrl	21	224.56	493.533	45.3995	57.6595	0.0919888	12.26	3	14.3333	0	0	20	85
C4T12	T12	C4	ctrl	22	236.814	522.267	45.0087	56.5387	0.0861796	11.53	3.33333	13.6667	0	0	15	67
C4T13	T13	C4	ctrl	20	215.143	438.933	37.0253	47.6886	0.0843528	10.6633	3	13	0	0	14.3333	59.6667
C4T14	T14	C4	ctrl	20	215.143	274.7	22.3405	31.2505	0.0813268	8.91	3.66667	18.3333	0	0	12.3333	44.3333
C4T15	T15	C4	ctrl	22	236.814	439.2	36.4052	47.9152	0.0828898	11.51	4	25	0	0	21	73.6667
C4T16	T16	C4	ctrl	21	224.56	476.833	42.4029	49.3029	0.088926	6.9	4	38.3333	0	0	14.6667	61
C4T17	T17	C4	ctrl	21	224.56	395.2	35.6605	45.4372	0.0902342	9.77667	3.66667	32	0	0	19	84
C4T18	T18	C4	ctrl	22	236.814	320.133	29.7612	38.5479	0.092965	8.78667	3	27	0	0	17	94
C4T19	T19	C4	ctrl	22	236.814	451.4	39.6516	52.0516	0.0878414	12.4	3.66667	31	0	0	19	62.6667
C4T20	T20	C4	ctrl	20	215.143	209.1	21.1162	28.1329	0.100986	7.01667	3.33333	30.3333	0	0	16	82.6667
C4T21	T21	C4	ctrl	22	236.814	458.8	35.2893	45.8926	0.0769165	10.6033	3	14	0	0	18.3333	66.3333
C4T22	T22	C4	ctrl	22	236.814	333.067	30.1198	39.3165	0.0904317	9.19667	3	19	1.66667	0.0923977	15.6667	55.6667
C4T23	T23	C4	ctrl	20	215.143	226.833	22.8643	30.041	0.100798	7.17667	4.33333	31	0	0	18.3333	82.3333
C4T24	T24	C4	ctrl	20	215.143	487.267	45.1604	57.3138	0.0926811	12.1533	5	41	0	0	20.3333	90.3333
C4T25	T25	C4	ctrl	22	236.814	476.033	41.4042	54.5675	0.0869775	13.1633	3.66667	29.3333	2.33333	0.0914401	20.3333	82.6667
C4T26	T26	C4	ctrl	20	215.143	362.1	27.9596	37.8196	0.0772152	9.86	5	43.6667	0.666667	0.0166667	18	76.6667
C4T27	T27	C4	ctrl	20	215.143	435.067	36.9119	47.7953	0.084842	10.8833	2.66667	11.6667	0	0	15	47.6667
C4T28	T28	C4	ctrl	22	236.814	482.6	37.2893	47.9893	0.0772675	10.7	2.66667	25.6667	0	0	15.3333	70.6667
C4T29	T29	C4	ctrl	22	236.814	409.133	35.2519	44.5519	0.0861624	9.3	2.66667	20.6667	0	0	16	85.3333
C4T30	T30	C4	ctrl	22	236.814	465.667	40.0321	52.4788	0.0859673	12.4467	3.66667	17.6667	0	0	18.3333	74
C4T31	T31	C4	ctrl	20	215.143	412.367	32.6379	41.5913	0.0791478	8.95333	3	18.3333	0	0	16.6667	72.3333
C4T32	T32	C4	ctrl	21	224.56	592.833	49.0155	61.3922	0.0826801	12.3767	4	24	0.666667	0.0416667	20.3333	87
C4T33	T33	C4	ctrl	22	236.814	656.667	53.3965	67.8432	0.0813145	14.4467	3	18.6667	0	0	17.6667	77.6667
C4T34	T34	C4	ctrl	22	236.814	525.367	41.7361	51.3794	0.0794418	9.64333	3	15.3333	0	0	16	58.3333
C4T35	T35	C4	ctrl	22	236.814	371.767	35.2934	45.0234	0.0949342	9.73	3	17	0.666667	0.0555556	12	50.3333
C4T36	T36	C4	ctrl	22	236.814	481.4	44.3161	58.2611	0.0920566	13.945	3	13.5	0	0	16	51
C4T37	T37	C4	ctrl	20	215.143	395.967	35.6197	46.0097	0.0899563	10.39	3.66667	20.6667	0	0	11	49.6667
C4T38	T38	C4	ctrl	22	236.814	393.633	35.5238	44.0438	0.0902459	8.52	3.33333	20	0	0	16	65.3333
C4T39	T39	C4	ctrl	21	224.56	523.85	45.2407	59.1207	0.0863619	13.88	4	34	4.5	0.131944	19	74
C4T40	T40	C4	ctrl	22	236.814	357.7	31.81	40.09	0.0889293	8.28	4	19	0	0	20	87
C4T41	T41	C4	ctrl	21	224.56	442.8	40.29	48.14	0.0909892	7.85	4	36	0	0	22	105
C4T42	T42	C4	ctrl	21	224.56	356.767	29.0956	37.759	0.0815537	8.66333	3.66667	23	0.333333	0.015873	19.6667	61.6667
C4T43	T43	C4	ctrl	21	224.56	430.467	36.3933	45.4367	0.0845439	9.04333	3.66667	80	0.666667	0.010582	18.3333	59.3333
C4T44	T44	C4	ctrl	21	224.56	471.5	42.4151	56.3885	0.0899579	13.9733	4	31.3333	1.66667	0.0515873	20.6667	66.3333
C4T45	T45	C4	ctrl	20	215.143	400	30.0259	39.8526	0.0750647	9.82667	5	28	0	0	18.3333	92.6667
C4T46	T46	C4	ctrl	20	215.143	427.367	36.0431	46.7664	0.0843376	10.7233	5.33333	47	0.333333	0.00666667	19	85.6667
C4T47	T47	C4	ctrl	22	236.814	351.767	31.538	39.728	0.0896561	8.19	3	14.3333	0	0	18.6667	99
C4T48	T48	C4	ctrl	20	215.143	310.267	25.3509	34.8876	0.0817069	9.53667	4.33333	24.6667	0	0	22.3333	58.3333
C4T49	T49	C4	ctrl	22	236.814	554.8	45.1598	56.0231	0.0813983	10.8633	5	27.5	0	0	21.5	84.5
C4T50	T50	C4	ctrl	22	236.814	288.233	24.5629	31.8429	0.0852189	7.28	5	32	1.66667	0.0520362	17.6667	67.3333
C4T51	T51	C4	ctrl	20	215.143	318.933	25.0481	34.7847	0.078537	9.73667	5.33333	34.3333	0.333333	0.0123457	20.3333	62
C4T52	T52	C4	ctrl	20	215.143	298.867	24.689	33.769	0.0826087	9.08	5	32.6667	0	0	19.3333	64.3333
C4T53	T53	C4	ctrl	20	215.143	289.333	26.2006	36.4606	0.0905552	10.26	5	29	0	0	18.3333	86.3333
C4T54	T54	C4	ctrl	22	236.814	445.3	38.1499	49.8999	0.0856724	11.75	3	15.3333	2.33333	0.183333	15.6667	93.3333
C4T55	T55	C4	ctrl	22	236.814	345.733	32.7667	40.8134	0.0947746	8.04667	3	34	0.666667	0.0229885	14	64.6667
C4T56	T56	C4	ctrl	20	215.143	482.6	38.1614	47.0848	0.0790747	8.92333	5	34.6667	0	0	18.3333	89.3333
C5T01	T01	C5	ctrl	20	210.932	276.333	21.1192	28.0558	0.0764264	6.93667	3	16.6667	0	0	14	56.3333
C5T02	T02	C5	ctrl	21	220.196	431	35.93	43.85	0.0833643	7.92	4	16	0	0	13	16
C5T03	T03	C5	ctrl	21	220.196	423.233	37.7818	46.9551	0.0892694	9.17333	4	22	0	0	17.3333	88.3333
C5T04	T04	C5	ctrl	21	220.196	383	34.9225	42.5891	0.0911814	7.66667	3.66667	13	0.333333	0.030303	16.3333	87.6667
C5T05	T05	C5	ctrl	21	220.196	500.233	36.9235	47.3068	0.0738125	10.3833	3.66667	33	0	0	16	93
C5T06	T06	C5	ctrl	22	232.528	476.433	41.1744	53.4844	0.0864221	12.31	4.66667	28	0	0	14.6667	73
C5T07	T07	C5	ctrl	21	220.196	509.5	37.3521	47.0354	0.0733113	9.68333	3.66667	12.6667	0	0	16	72
C5T08	T08	C5	ctrl	20	210.932	343.567	27.5963	35.5463	0.080323	7.95	2.66667	14	0	0	15.6667	66
C5T09	T09	C5	ctrl	21	220.196	463.533	36.4858	46.3392	0.0787124	9.85333	4.33333	13	0.333333	0.0222222	15.3333	68.3333
C5T10	T10	C5	ctrl	22	232.528	365.8	35.1427	42.9994	0.0960709	7.85667	3	21.6667	0	0	18.6667	70
C5T11	T11	C5	ctrl	22	232.528	579.033	51.1344	64.0444	0.0883099	12.91	3.66667	10.3333	0	0	19.6667	80
C5T12	T12	C5	ctrl	22	232.528	463.567	38.0341	46.2474	0.0820466	8.21333	3	12.3333	0	0	15.6667	62.3333
C5T13	T13	C5	ctrl	20	210.932	369.467	28.5339	36.4072	0.0772299	7.87333	2	13	0	0	14.6667	62.6667
C5T14	T14	C5	ctrl	20	210.932	379.833	31.4924	42.1991	0.0829112	10.7067	2	17.6667	0	0	12.3333	51
C5T15	T15	C5	ctrl	22	232.528	427.667	31.1802	40.0935	0.0729077	8.91333	4.66667	36	0.333333	0.00854701	22	80.3333
C5T16	T16	C5	ctrl	21	220.196	447.8	36.9956	47.0256	0.0826164	10.03	5	34	0	0	15.3333	62
C5T17	T17	C5	ctrl	21	220.196	355.133	31.3614	38.428	0.0883087	7.06667	4	31.6667	0	0	16.6667	79.6667
C5T18	T18	C5	ctrl	22	232.528	348.567	31.3142	38.5108	0.089837	7.19667	4	24	0	0	18	84.3333
C5T19	T19	C5	ctrl	22	232.528	431.8	37.4227	46.9427	0.0866667	9.52	4	33.3333	0	0	19.3333	59
C5T20	T20	C5	ctrl	20	210.932	242.333	23.8611	29.6945	0.0984642	5.83333	3.33333	21.6667	0	0	16.3333	88
C5T21	T21	C5	ctrl	21	220.196	409.967	31.8667	39.9167	0.07773	8.05	3.33333	17.3333	1.66667	0.0930728	17	60
C5T22	T22	C5	ctrl	21	220.196	326.367	27.749	35.2957	0.085024	7.54667	3.33333	16.3333	0.333333	0.0222222	16	48.6667
C5T23	T23	C5	ctrl	20	210.932	265.267	25.526	31.5626	0.0962276	6.03667	3	18.6667	0	0	16.6667	92.3333
C5T24	T24	C5	ctrl	20	210.932	510.333	42.6343	51.7643	0.083542	9.13	4.66667	23.6667	0.666667	0.0229885	21	92
C5T25	T25	C5	ctrl	22	232.528	430.133	34.9979	43.9512	0.0813652	8.95333	4	29.3333	1	0.0277778	20	71
C5T26	T26	C5	ctrl	20	210.932	338.9	25.9071	33.5338	0.0764447	7.62667	4	36	0.666667	0.047619	17	70.6667
C5T27	T27	C5	ctrl	20	210.932	386.9	29.8683	37.7017	0.0771991	7.83333	2.66667	11.3333	0	0	14.3333	50.3333
C5T28	T28	C5	ctrl	22	232.528	353.833	28.7596	38.0263	0.0812802	9.26667	2.66667	16	0	0	14.3333	56
C5T29	T29	C5	ctrl	22	232.528	428.433	34.6977	42.8077	0.0809873	8.11	3.66667	19	0	0	17.6667	73
C5T30	T30	C5	ctrl	22	232.528	571.467	44.2721	54.4421	0.077471	10.17	4	18.6667	0	0	17.6667	78
C5T31	T31	C5	ctrl	20	210.932	441.167	31.9735	40.0169	0.072475	8.04333	2.33333	19	0	0	15.6667	77
C5T32	T32	C5	ctrl	21	220.196	487.233	39.1525	48.6512	0.0803568	9.49867	3.66667	12.6667	0.333333	0.0222222	16	66.3333
C5T33	T33	C5	ctrl	22	232.528	586.4	48.4587	57.892	0.0826376	9.43333	3	12.6667	0	0	17.6667	83.3333
C5T34	T34	C5	ctrl	21	220.196	424.233	31.2835	37.9902	0.0737413	6.70667	2.33333	9	0	0	14.6667	50.6667
C5T35	T35	C5	ctrl	22	232.528	387.4	34.2541	42.7208	0.0884205	8.46667	3.33333	11.3333	0	0	12	62.3333
C5T36	T36	C5	ctrl	22	232.528	357.25	27.9194	35.8944	0.078151	7.975	2.5	8	0	0	15	54.5
C5T37	T37	C5	ctrl	20	210.932	386.667	31.9026	39.7959	0.0825067	7.89333	2.66667	20.3333	0	0	12.3333	62.6667
C5T38	T38	C5	ctrl	22	232.528	475.8	41.9509	50.6643	0.0881692	8.71333	3.66667	25.3333	0	0	10.3333	62
C5T39	T39	C5	ctrl	21	220.196	498.4	38.0416	49.6816	0.0763275	11.64	3	17.5	2.5	0.132479	18.5	78.5
C5T40	T40	C5	ctrl	22	232.528	432	35.68	44.93	0.0825926	9.25	5	25	0	0	19	88
C5T41	T41	C5	ctrl	21	220.196	425.6	38.52	46.31	0.0905075	7.79	3	23	0	0	21	98
C5T42	T42	C5	ctrl	22	232.528	410.933	33.9631	42.0664	0.0826486	8.10333	4.33333	43	0	0	18.6667	68
C5T43	T43	C5	ctrl	21	220.196	397.633	31.6578	38.5711	0.0796156	6.91333	4.33333	56.3333	0	0	16	66.6667
C5T44	T44	C5	ctrl	22	232.528	462.133	42.154	44.1673	0.0912161	2.01333	5	22.6667	1	0.033179	21.6667	65.6667
C5T45	T45	C5	ctrl	20	210.932	411.933	29.8832	38.4532	0.0725437	8.57	5	37.3333	1.33333	0.03934	22	103.333
C5T46	T46	C5	ctrl	20	210.932	478.833	43.9276	55.331	0.0917389	11.4033	3.66667	25	0	0	21.3333	92.6667
C5T47	T47	C5	ctrl	22	232.528	388.933	34.3644	42.6344	0.0883556	8.27	3.66667	13.3333	0	0	19.6667	98.3333
C5T48	T48	C5	ctrl	20	210.932	297.7	24.0183	32.5617	0.0806797	8.54333	4	20.6667	0	0	21.3333	59
C5T49	T49	C5	ctrl	22	232.528	572.733	44.7221	53.5888	0.0780854	8.86667	5.66667	26	0	0	20.3333	77
C5T50	T50	C5	ctrl	22	232.528	324.567	27.0879	34.7612	0.0834586	7.67333	4.66667	29	0	0	16.3333	75.3333
C5T51	T51	C5	ctrl	20	210.932	307.9	24.3497	32.3097	0.0790832	7.96	4	24.3333	0	0	19.3333	57
C5T52	T52	C5	ctrl	20	210.932	296.4	24.2583	32.5849	0.081843	8.32667	4	28.6667	0	0	18.3333	63
C5T53	T53	C5	ctrl	20	210.932	322.433	26.367	33.237	0.0817751	6.87	4	26	0	0	18.3333	82.3333
C5T54	T54	C5	ctrl	21	220.196	344.267	29.464	40.474	0.0855848	11.01	4	20.3333	1	0.0732601	13.6667	83.6667
C5T55	T55	C5	ctrl	22	232.528	393.133	35.7734	45.3834	0.0909956	9.61	4.33333	30.3333	1.66667	0.0542929	13	63.3333
C5T56	T56	C5	ctrl	20	210.932	461	33.2244	39.8644	0.0720703	6.64	4	30.6667	0	0	19	89
C6T01	T01	C6	heat	19	347.077	297.333	27.2413	33.3046	0.0916186	6.06333	3.33333	23.3333	0.666667	0.0222222	17	79
C6T02	T02	C6	heat	21	381.65	315.9	30.4	36.88	0.096233	6.48	5	21	2	0.0952381	14	70
C6T03	T03	C6	heat	21	381.65	350.1	33.4955	41.9489	0.0956742	8.45333	5	33.3333	1	0.0322581	23	82.3333
C6T04	T04	C6	heat	21	381.65	354.567	32.9666	41.1733	0.0929773	8.20667	4.66667	21.6667	0.333333	0.0196078	18	121
C6T05	T05	C6	heat	21	381.65	314.467	32.1963	39.4329	0.102384	7.23667	4.33333	44.6667	3	0.0667388	21	120.667
C6T06	T06	C6	heat	21	381.65	397.467	36.9011	46.6211	0.0928407	9.72	6.33333	26.6667	0.666667	0.0227623	16	95.6667
C6T07	T07	C6	heat	21	381.65	377.4	31.5194	39.0828	0.0835173	7.56333	4	21	0	0	19	102
C6T08	T08	C6	heat	19	347.077	238.933	19.5594	25.4394	0.0818615	5.88	1.66667	8	0.666667	0.0673401	16.3333	86
C6T09	T09	C6	heat	21	381.65	358.333	28.1085	35.5119	0.0784424	7.40333	4.33333	19.6667	0.666667	0.037037	20.3333	103
C6T10	T10	C6	heat	20	366.876	299.8	28.3063	35.9129	0.0944172	7.60667	4	25.6667	0	0	19.3333	102
C6T11	T11	C6	heat	21	381.65	381.1	32.9092	41.1826	0.0863532	8.27333	2.66667	14	0	0	17.3333	68.6667
C6T12	T12	C6	heat	20	366.876	370.6	33.7598	40.3264	0.0910949	6.56667	3.66667	14	0	0	17	90
C6T13	T13	C6	heat	19	347.077	257.467	21.6679	26.9779	0.084158	5.31	3	11.6667	0	0	15.6667	82.6667
C6T14	T14	C6	heat	19	347.077	235.733	20.0991	27.4491	0.0852619	7.35	3.33333	27.3333	0	0	14	61.3333
C6T15	T15	C6	heat	21	381.65	362.933	30.0362	37.0829	0.0827596	7.04667	5	39	1	0.0227273	24.3333	112.667
C6T16	T16	C6	heat	21	381.65	299.7	27.4749	36.1949	0.0916748	8.72	5.66667	45.6667	0	0	17.3333	77.3333
C6T17	T17	C6	heat	21	381.65	311	28.9954	35.1721	0.0932329	6.17667	4.33333	46	0.666667	0.0188828	21.3333	110.333
C6T18	T18	C6	heat	21	381.65	319	31.2823	38.3457	0.0980637	7.06333	5	37.3333	0	0	20.3333	114.333
C6T19	T19	C6	heat	21	381.65	303.933	27.226	35.1726	0.0895788	7.94667	4.66667	36.3333	2.33333	0.0802469	20	66.6667
C6T20	T20	C6	heat	19	347.077	179.733	19.8272	24.8972	0.110314	5.07	3.33333	25	0	0	18.6667	93.6667
C6T21	T21	C6	heat	21	381.65	398.667	33.8815	42.8748	0.0849871	8.99333	3.66667	23	1.33333	0.0496343	20.3333	79.6667
C6T22	T22	C6	heat	21	381.65	276.033	24.0692	30.4658	0.0871966	6.39667	4	25.3333	6.66667	0.263889	19	74.6667
C6T23	T23	C6	heat	19	347.077	201.2	20.3388	26.2521	0.101087	5.91333	3	27	0.333333	0.0128205	17.6667	105.667
C6T24	T24	C6	heat	19	347.077	422.2	39.4007	47.1407	0.0933224	7.74	5	36.3333	0	0	22	122.333
C6T25	T25	C6	heat	21	381.65	356.433	29.7981	37.3147	0.0836007	7.51667	4	32.3333	10.3333	0.317349	17.6667	76.6667
C6T26	T26	C6	heat	19	347.077	345.867	25.6742	31.9342	0.0742315	6.26	5	47.6667	13.3333	0.252661	21	106.667
C6T27	T27	C6	heat	19	347.077	331.7	29.2184	34.6817	0.0880869	5.46333	2.33333	9.33333	0	0	16	75.3333
C6T28	T28	C6	heat	20	366.876	295.833	25.9554	32.8121	0.0877366	6.85667	3	14.5	0	0	18	103
C6T29	T29	C6	heat	21	381.65	293.1	24.6534	30.4001	0.0841126	5.74667	4	22	0	0	17	106.667
C6T30	T30	C6	heat	21	381.65	420.4	36.5331	44.8598	0.0869008	8.32667	4.66667	23	1	0.0484848	18.3333	83.6667
C6T31	T31	C6	heat	19	347.077	349.033	27.5693	37.736	0.0789876	10.1667	3.33333	19.6667	0.333333	0.0175439	18.6667	92.3333
C6T32	T32	C6	heat	21	381.65	377.4	34.8613	42.6279	0.0923722	7.76667	3.66667	30	0.333333	0.010101	18.6667	89.6667
C6T33	T33	C6	heat	21	381.65	478.1	44.9869	53.9702	0.0940951	8.98333	3.66667	37	0.666667	0.0185185	20.6667	103.667
C6T34	T34	C6	heat	21	381.65	386	34.1051	41.4151	0.0883551	7.31	2.66667	14.3333	0	0	16.6667	108
C6T35	T35	C6	heat	21	381.65	440.9	36.5096	44.3963	0.0828071	7.88667	3.66667	18.3333	0	0	16.3333	80
C6T36	T36	C6	heat	21	381.65	385	33.19	40.9	0.0862078	7.71	3	20	0	0	18	63
C6T37	T37	C6	heat	19	347.077	271.7	25.0731	33.0498	0.0922823	7.97667	2.33333	20.6667	0	0	11.3333	70.6667
C6T38	T38	C6	heat	21	381.65	279.5	23.2105	29.1505	0.0830429	5.94
C6T39	T39	C6	heat	21	381.65	485.867	42.6889	54.2122	0.0878613	11.5233	4.66667	40.3333	1.33333	0.0374625	21.3333	105.333
C6T40	T40	C6	heat	21	381.65	165.3	15.7	21.51	0.0949788	5.81	6	35	0	0	21	78
C6T41	T41	C6	heat	20	366.876	420	44.16	54.23	0.105143	10.07	5	38	1	0.0263158	24	97
C6T42	T42	C6	heat	21	381.65	317.067	21.3386	27.9586	0.0673001	6.62	4.33333	38.3333	0.333333	0.00952381	23.3333	89.3333
C6T43	T43	C6	heat	20	366.876	280.9	25.9159	32.3925	0.0922602	6.47667	4	87.6667	13	0.156244	18.3333	82
C6T44	T44	C6	heat	21	381.65	331.167	31.7894	39.3794	0.095992	7.59	3.66667	33.6667	7	0.210922	21.6667	107.667
C6T45	T45	C6	heat	19	347.077	340.567	26.3131	41.9931	0.0772628	15.68	5	23	2.66667	0.102564	24	108
C6T46	T46	C6	heat	19	347.077	393.967	34.2608	43.2108	0.0869638	8.95	5	39.6667	0	0	23.3333	116.667
C6T47	T47	C6	heat	20	366.876	249.433	26.326	33.786	0.105543	7.46	3.66667	15.3333	0	0	19.6667	100
C6T48	T48	C6	heat	19	347.077	241.967	18.8972	23.6272	0.0780985	4.73	5	29.3333	13	0.45098	23.6667	103
C6T49	T49	C6	heat	21	381.65	449.867	39.6508	47.0508	0.088139	7.4	6.33333	29.3333	2	0.0777126	23.6667	107.667
C6T50	T50	C6	heat	21	381.65	285.333	26.6227	35.2093	0.0933037	8.58667	6	33.6667	0	0	20.3333	93.6667
C6T51	T51	C6	heat	19	347.077	257.933	17.0485	24.9752	0.0660966	7.92667
C6T52	T52	C6	heat	19	347.077	253.467	22.6104	30.6071	0.0892048	7.99667	5	31.3333	0	0	21.3333	73.3333
C6T53	T53	C6	heat	19	347.077	229.467	21.9756	28.969	0.0957684	6.99333
C6T54	T54	C6	heat	20	366.876	369.667	35.5009	48.2009	0.096035	12.7	4	21.3333	1.33333	0.0444444	17	83
C6T55	T55	C6	heat	21	381.65	285.567	25.956	32.796	0.090893	6.84	5	33.6667	0.333333	0.015873	16	78
C6T56	T56	C6	heat	19	347.077	359.433	31.3788	36.1121	0.0873008	4.73333	4.66667	41	0	0	20.6667	106.333
C7T01	T01	C7	ctrl	20	212.913	286.833	22.7379	28.5812	0.0792722	5.84333	2.66667	26.3333	0	0	15	55.6667
C7T02	T02	C7	ctrl	22	234.525	373	31.59	41.23	0.0846917	9.64	2	12	0	0	9	30
C7T03	T03	C7	ctrl	22	234.525	431.567	38.9678	48.3745	0.0902939	9.40667	3.66667	40.6667	0	0	19	64.6667
C7T04	T04	C7	ctrl	22	234.525	451.5	42.8428	52.5795	0.0948899	9.73667	4	20.3333	0	0	17	95
C7T05	T05	C7	ctrl	22	234.525	506.533	43.673	52.9163	0.0862194	9.24333	3.66667	39	0	0	18.3333	105.333
C7T06	T06	C7	ctrl	22	234.525	469.2	43.596	54.2593	0.0929156	10.6633	4	19.6667	0	0	12.3333	60
C7T07	T07	C7	ctrl	22	234.525	545.833	41.0038	47.3505	0.0751215	6.34667	3.66667	18.3333	0	0	17.3333	69.6667
C7T08	T08	C7	ctrl	20	212.913	321.667	24.5316	30.0849	0.0762639	5.55333	2	9.66667	0	0	16.3333	71.3333
C7T09	T09	C7	ctrl	22	234.525	493.833	36.2132	47.7532	0.0733308	11.54	4.33333	21.3333	0	0	17	67
C7T10	T10	C7	ctrl	22	234.525	393.033	33.0749	40.9382	0.0841529	7.86333	3.33333	18	0	0	16.3333	73
C7T11	T11	C7	ctrl	22	234.525	530	39.5832	48.8065	0.0746853	9.22333	3	14.6667	0	0	19	91.6667
C7T12	T12	C7	ctrl	22	234.525	424.267	32.2435	38.9068	0.0759982	6.66333	3	13.3333	0	0	15.3333	60.3333
C7T13	T13	C7	ctrl	20	212.913	360.833	27.1153	33.5953	0.0751463	6.48	2	13	0	0	14.3333	65.3333
C7T14	T14	C7	ctrl	20	212.913	318.933	20.3336	29.1336	0.063755	8.8	3.33333	22	0	0	14	53
C7T15	T15	C7	ctrl	22	234.525	421.067	29.9881	37.8447	0.0712193	7.85667	4.33333	42.3333	0	0	20	75.3333
C7T16	T16	C7	ctrl	22	234.525	490.8	38.0533	50.3733	0.0775332	12.32	5.33333	46	0	0	16.3333	69
C7T17	T17	C7	ctrl	22	234.525	397.567	38.3484	46.4584	0.0964577	8.11	4	30	0	0	18.6667	72.3333
C7T18	T18	C7	ctrl	22	234.525	350.5	35.7715	44.2082	0.102059	8.43667	3.66667	32.3333	0	0	17.3333	79
C7T19	T19	C7	ctrl	22	234.525	474.5	42.7923	55.069	0.090184	12.2767	5	34.6667	0	0	19.3333	54
C7T20	T20	C7	ctrl	20	212.913	225.367	23.4806	29.9839	0.104188	6.50333	3	31	0	0	17	86.3333
C7T21	T21	C7	ctrl	22	234.525	428.933	33.7572	41.5139	0.0787004	7.75667	4.33333	26.6667	0	0	16.6667	58.3333
C7T22	T22	C7	ctrl	22	234.525	376.633	33.3084	41.3651	0.0884373	8.05667	4	26.6667	0	0	16.6667	55.3333
C7T23	T23	C7	ctrl	20	212.913	280.5	29.5249	36.2449	0.105258	6.72	3	32.6667	0.333333	0.0111111	17	89
C7T24	T24	C7	ctrl	20	212.913	448.4	62.3661	70.1961	0.139086	7.83	4.33333	41	0	0	19.6667	98.6667
C7T25	T25	C7	ctrl	22	234.525	449.733	32.4917	41.9117	0.0722466	9.42	3.66667	24	0	0	19	70.6667
C7T26	T26	C7	ctrl	20	212.913	379.633	27.1827	35.1527	0.0716024	7.97	4	44.3333	0	0	18.6667	80.3333
C7T27	T27	C7	ctrl	20	212.913	418.8	31.067	39.5137	0.074181	8.44667	2	13.3333	0	0	14.6667	49.6667
C7T28	T28	C7	ctrl	22	234.525	453.35	33.2599	42.5499	0.0733647	9.29	3	33.5	0	0	15	67
C7T29	T29	C7	ctrl	22	234.525	408.967	32.4199	40.3299	0.0792726	7.91	4	24.6667	0	0	15.6667	79.3333
C7T30	T30	C7	ctrl	22	234.525	482.367	32.7456	42.8889	0.0678853	10.1433	4.66667	24.6667	0	0	18.6667	75.3333
C7T31	T31	C7	ctrl	20	212.913	418.933	31.0658	38.8391	0.0741545	7.77333	2	21.6667	0	0	16	73
C7T32	T32	C7	ctrl	22	234.525	538.8	40.41	50.8933	0.075	10.4833	4.33333	22	0	0	17.3333	66.6667
C7T33	T33	C7	ctrl	22	234.525	514.6	35.4649	44.3149	0.0689174	8.85	3	20.6667	0	0	15.6667	73.6667
C7T34	T34	C7	ctrl	22	234.525	550.567	44.3555	55.1788	0.0805633	10.8233	3	16.6667	0	0	15.6667	53
C7T35	T35	C7	ctrl	22	234.525	285.6	22.956	30.086	0.0803781	7.13	3	19	0	0	13.5	54
C7T36	T36	C7	ctrl	22	234.525	406.5	27.68	35.41	0.0680935	7.73	2	10	0	0	16	68
C7T37	T37	C7	ctrl	20	212.913	408.233	32.4357	40.7457	0.0794538	8.31	3	22.6667	0	0	10.6667	63.3333
C7T38	T38	C7	ctrl	22	234.525	377.45	32.2863	41.0713	0.0855378	8.785	4	25.5	0	0	13	61.5
C7T39	T39	C7	ctrl	22	234.525	503.533	38.3962	49.6762	0.0762535	11.28	3.66667	28	1.33333	0.0780952	18.3333	79.3333
C7T41	T41	C7	ctrl	22	234.525	519.1	48.53	59.83	0.0934887	11.3	5	29	0	0	24	116
C7T42	T42	C7	ctrl	22	234.525	384.067	29.3439	37.5039	0.0764033	8.16	4	36.6667	0.333333	0.00854701	20.3333	60
C7T43	T43	C7	ctrl	22	234.525	422.467	30.5406	37.904	0.0722912	7.36333	4	68.3333	0.333333	0.003367	17.3333	68.6667
C7T44	T44	C7	ctrl	22	234.525	410.667	30.3968	39.1401	0.0740181	8.74333	4	24.3333	1.66667	0.0641026	20	66
C7T45	T45	C7	ctrl	20	212.913	419.567	30.7203	39.3769	0.073219	8.65667	4.66667	31	0	0	19	78
C7T46	T46	C7	ctrl	20	212.913	406.1	40.6387	48.3554	0.100071	7.71667	4	35.3333	0	0	19.3333	84
C7T47	T47	C7	ctrl	22	234.525	329	27.6451	34.7084	0.0840276	7.06333	3	15	0	0	17	92.3333
C7T48	T48	C7	ctrl	20	212.913	505.867	38.1778	45.5178	0.07547	7.34	3.66667	29.3333	0	0	24.6667	67.3333
C7T49	T49	C7	ctrl	22	234.525	312.233	24.6068	33.1235	0.0788091	8.51667	5.33333	32.6667	0.333333	0.0104167	20	83.3333
C7T50	T50	C7	ctrl	22	234.525	292	24.5426	31.6259	0.08405	7.08333	5	36.6667	0	0	17.3333	74.3333
C7T51	T51	C7	ctrl	20	212.913	312.933	24.2812	33.3579	0.0775923	9.07667	4	34.6667	0	0	20.3333	54.3333
C7T52	T52	C7	ctrl	20	212.913	288.967	25.7523	32.7956	0.0891184	7.04333	4	22.3333	0	0	18.6667	90.3333
C7T53	T53	C7	ctrl	20	212.913	284.167	24.8763	33.2263	0.0875411	8.35	4	31.6667	0	0	18.3333	82
C7T54	T54	C7	ctrl	22	234.525	407.667	36.5724	46.1357	0.0897115	9.56333	3.66667	24.6667	0	0	13	86
C7T55	T55	C7	ctrl	22	234.525	354.967	36.3733	44.8333	0.10247	8.46	5	35	0	0	14.3333	68
C7T56	T56	C7	ctrl	20	212.913	456.967	33.2084	39.2618	0.0726715	6.05333	3	45.3333	0	0	19.3333	93.6667
